# Supplementary material
Source: PubMed Central journal article supplement (PMC6243270)
Supplement: pnas.1810622115.sapp.pdf [file pnas.1810622115.sapp.pdf]

# Supporting Information for

## **Structural consequences of hereditary spastic paraplegia disease-related mutations in kinesin**

**Mandira Dutta<sup>1</sup>, Michael R. Diehl<sup>2,3</sup>, José N. Onuchic<sup>3,4,5,6\*</sup> and Biman Jana<sup>1\*</sup>**

<sup>1</sup>Department of Physical Chemistry, Indian Association for the Cultivation of Science, Jadavpur, Kolkata 700032, India

<sup>2</sup>Department of Bioengineering, Rice University, Houston, TX 77030, USA

<sup>3</sup>Department of Chemistry, Rice University, Houston, TX 77030, USA

<sup>4</sup>Center for Theoretical Biological Physics, Rice University, Houston, TX 77005, USA

<sup>5</sup>Department of Physics and Astronomy, Rice University, Houston, TX 77005, USA

<sup>6</sup>Department of Biosciences, Rice University, Houston, TX 77005, USA

\*To whom correspondence should be addressed. Email: [jonuchic@rice.edu](mailto:jonuchic@rice.edu) and [pcbj@iacs.res.in](mailto:pcbj@iacs.res.in)



**Figure S1.** Free energy ( $\Delta G$ ) profiles for the mutations of 280Arg to Ser (A and B), 253Lys to Asn (C and D), 256Asn to Ser (E and F), 60Glu to Val (G and H).  $\left\langle \frac{\delta H}{\delta \lambda} \right\rangle_{\lambda}$  values are plotted as a function of  $\lambda$  when the head is bound to the MT (A, C, E, G) and when the head is free in solution (B, D, F, H) for four independent simulations (Black, Red, Blue and Green). The error bars represent statistical errors.
